# Supplementary material
Source: PubMed Central journal article supplement (PMC2542883)
Supplement: NIHMS62643-supplement-1File002.pdf [file NIHMS62643-supplement-1File002.pdf]

## **Polarizable empirical force field for the primary and secondary alcohol series based on the classical Drude model**

Victor M. Anisimov<sup>1</sup>, Igor V. Vorobyov<sup>1</sup>, Benoît Roux<sup>2</sup>, Alexander D. MacKerell, Jr. <sup>1\*</sup>

<sup>1</sup>Department of Pharmaceutical Sciences, School of Pharmacy, University of Maryland, Baltimore, 20 Penn St., Baltimore, MD 21201

<sup>2</sup>Institute of Molecular Pediatric Sciences, Gordon Center for Integrative Science, University of Chicago 929 E. 57<sup>th</sup> St. Chicago, IL 60637

\*Corresponding author e-mail: alex@outerbanks.umaryland.edu

Table S1. Methanol vibrational spectra, cm<sup>-1</sup>.

| Exp. <sup>1</sup> | QM <sup>2</sup> | Assignment     | Drude | Assignment | Diff., % <sup>3</sup> |
|-------------------|-----------------|----------------|-------|------------|-----------------------|
| 200               | 332             | COtorsion      | 306   | COtorsion  | 53                    |
| 1033              | 1022            | COstr          | 1036  | COstr      | 0                     |
| 1060              | 1050            | COstr; CH3rock | 1098  | CH3rock    | 4                     |
| 1165              | 1136            | CH3rock        | 1121  | CH3rock    | 4                     |
| 1345              | 1338            | COHdef         | 1342  | COHdef     | 0                     |
| 1455              | 1452            | CH3def         | 1438  | CH3def     | 1                     |
| 1477              | 1476            | CH3def         | 1442  | CH3def     | 2                     |
| 1477              | 1489            | CH3def         | 1611  | CH3def     | 9                     |

|      |      |        |      |        |   |
|------|------|--------|------|--------|---|
| 2844 | 2901 | CH3str | 2849 | CH3str | 0 |
| 2960 | 2964 | CH3str | 2914 | CH3str | 2 |
| 3000 | 3038 | CH3str | 2914 | CH3str | 3 |
| 3681 | 3580 | OHstr  | 3654 | OHstr  | 1 |

<sup>1</sup>NIST Chemistry WebBook (<http://webbook.nist.gov/chemistry>). <sup>2</sup>MP2/6-31G\* level of theory; frequencies scaled by factor 0.9434. <sup>3</sup>Diff = [abs( $v_{\text{exp}} - v_{\text{emp}}$ )/  $v_{\text{exp}}$ ]\*100

Table S2. Ethanol vibrational spectra,  $\text{cm}^{-1}$

| Exp. <sup>1</sup> | QM <sup>2</sup> | Assignment            | Drude | Assignment            | Diff, % <sup>3</sup> |
|-------------------|-----------------|-----------------------|-------|-----------------------|----------------------|
| –                 | 249             | COtorsion             | 258   | COtorsion             | 4                    |
| –                 | 295             | CCtorsion             | 292   | CCtorsion             | 1                    |
| 417               | 402             | OCCsciss              | 418   | OCCsciss              | 0                    |
| 812               | 799             | CH3rock, CH2rock      | 844   | CH2rock, CH3rock      | 4                    |
| 888               | 883             | COstr, CH3rock, CCstr | 886   | CCstr, Costr, CH3rock | 0                    |
| 1028              | 1017            | CCstr                 | 1025  | CH3rock, CCstr        | 0                    |
| 1091              | 1079            | COstr, CH3rock        | 1062  | COstr                 | 3                    |
| 1161              | 1153            | CH2rock, CH3rock      | 1058  | CH3rock, CH2rock      | 9                    |
| 1256              | 1237            | HOCdef                | 1254  | HOCdef                | 0                    |
| 1275              | 1260            | CH2twist              | 1249  | CH2twist              | 2                    |
| 1371              | 1372            | CH3def                | 1421  | CH3def                | 4                    |
| 1412              | 1423            | CH2wag                | 1402  | CH2sciss, CH2wag      | 1                    |

|      |      |          |      |                  |   |
|------|------|----------|------|------------------|---|
| 1446 | 1461 | CH3def   | 1424 | CH3def           | 2 |
| 1464 | 1477 | CH3def   | 1429 | CH3def           | 2 |
| 1490 | 1507 | CH2sciss | 1555 | CH2wag, CH2sciss | 4 |
| 2900 | 2887 | CH2str   | 2853 | CH2str           | 2 |
| 2910 | 2927 | CH2str   | 2885 | CH2str           | 1 |
| 2939 | 2941 | CH3str   | 2904 | CH3str           | 1 |
| 2984 | 3027 | CH3str   | 2959 | CH3str           | 1 |
| 2991 | 3037 | CH3str   | 2960 | CH3str           | 1 |
| 3653 | 3565 | OHstr    | 3653 | OHstr            | 0 |

<sup>1</sup>Matrix isolation<sup>94</sup>. <sup>2</sup>MP2/6-31G\* level of theory; frequencies scaled by factor 0.9434.

<sup>3</sup>Diff = [abs( $v_{\text{exp}} - v_{\text{emp}}$ ) /  $v_{\text{exp}}$ ]\*100

Table S3. Iso-propanol vibrational spectra,  $\text{cm}^{-1}$

| QM <sup>1</sup> | Assignment | Drude | Assignment | Diff, % <sup>2</sup> |
|-----------------|------------|-------|------------|----------------------|
| 238             | CCtorsion  | 219   | CCtorsion  | 8                    |
| 275             | CCtorsion  | 228   | CCtorsion  | 17                   |
| 293             | COtorsion  | 257   | COtorsion  | 12                   |
| 348             | CCCrock    | 352   | CCCrock    | 1                    |
| 411             | OCCrock    | 403   | OCCrock    | 2                    |
| 457             | CCCsciss   | 411   | CCCsciss   | 10                   |
| 799             | CCstr      | 798   | CCstr      | 0                    |

|      |                 |      |                |   |
|------|-----------------|------|----------------|---|
| 900  | CH3rock         | 912  | CH3rock        | 1 |
| 918  | CCstr, CH3rock  | 933  | CH3rock, CCstr | 2 |
| 950  | COstr, CH3rock  | 955  | CH3rock        | 1 |
| 1050 | COHdef, OCHrock | 1104 | OCHrock        | 5 |
| 1130 | CCstr           | 1113 | CCstr          | 2 |
| 1163 | CH3rock         | 1055 | CH3rock        | 9 |
| 1277 | COHdef          | 1275 | COHdef         | 0 |
| 1334 | CCHrock         | 1340 | CCHrock        | 0 |
| 1371 | OCHrock         | 1455 | OCHrock        | 6 |
| 1376 | CH3rock         | 1390 | CH3rock        | 1 |
| 1388 | CH3rock         | 1393 | CH3rock        | 0 |
| 1460 | CH3rock         | 1416 | CH3rock        | 3 |
| 1462 | CH3rock         | 1424 | CH3rock        | 3 |
| 1473 | CH3rock         | 1425 | CH3rock        | 3 |
| 1481 | CH3rock         | 1427 | CH3rock        | 4 |
| 2919 | CH3str          | 2898 | CH3str         | 1 |
| 2922 | CH3str          | 2900 | CH3str         | 1 |
| 2956 | CHstr           | 2909 | CHstr          | 2 |
| 2998 | CH3str          | 2957 | CH3str         | 1 |
| 3006 | CH3str          | 2958 | CH3str         | 2 |
| 3027 | CH3str          | 2959 | CH3str         | 2 |

|      |        |      |        |   |
|------|--------|------|--------|---|
| 3028 | CH3str | 2960 | CH3str | 2 |
| 3532 | OHstr  | 3656 | OHstr  | 4 |

<sup>1</sup>MP2/6-31G\* level of theory; frequencies scaled by factor 0.9434. <sup>3</sup>Diff = [abs( $v_{qm} - v_{emp}$ )/  $v_{qm}$ ]\*100

Table S4. Minimum distances and interaction energies of rare gases with methanol and ethanol.

|         | QM        |           | Drude     |           | CHARMM22  |           |
|---------|-----------|-----------|-----------|-----------|-----------|-----------|
|         | $R_{min}$ | $E_{int}$ | $R_{min}$ | $E_{int}$ | $R_{min}$ | $E_{int}$ |
| MeOH+He |           |           |           |           |           |           |
| BIS     | 3.29      | -0.09     | 3.15      | -0.11     | 3.17      | -0.10     |
| 180     | 3.18      | -0.10     | 3.20      | -0.08     | 3.21      | -0.08     |
| 120     | 3.48      | -0.08     | 3.15      | -0.12     | 3.16      | -0.11     |
| ROH     | 2.50      | -0.13     | 2.15      | -0.12     | 2.17      | -0.12     |
| CH3     | 3.18      | -0.15     | 3.34      | -0.12     | 3.37      | -0.09     |
| MeOH+Ne |           |           |           |           |           |           |
| BIS     | 3.19      | -0.35     | 3.16      | -0.24     | 3.22      | -0.20     |
| 180     | 3.11      | -0.39     | 3.21      | -0.17     | 3.25      | -0.16     |
| 120     | 3.29      | -0.38     | 3.16      | -0.26     | 3.21      | -0.22     |
| ROH     | 2.37      | -0.61     | 2.09      | -0.33     | 2.21      | -0.24     |
| CH3     | 3.22      | -0.53     | 3.39      | -0.24     | 3.42      | -0.19     |
| EtOH+He |           |           |           |           |           |           |
| BIS     | 3.32      | -0.13     | 3.12      | -0.15     | 3.14      | -0.16     |
| 180     | 3.18      | -0.10     | 3.18      | -0.08     | 3.18      | -0.08     |
| 120     | 3.51      | -0.10     | 3.12      | -0.16     | 3.15      | -0.16     |
| ROH     | 2.52      | -0.13     | 2.15      | -0.12     | 2.16      | -0.12     |

|         |      |       |      |       |      |       |
|---------|------|-------|------|-------|------|-------|
| CH3     | 3.35 | -0.12 | 3.33 | -0.10 | 3.35 | -0.10 |
| CH2     | 3.59 | -0.10 | 3.33 | -0.13 | 3.44 | -0.11 |
| EtOH+Ne |      |       |      |       |      |       |
| BIS     | 3.17 | -0.58 | 3.13 | -0.35 | 3.19 | -0.32 |
| 180     | 3.11 | -0.42 | 3.21 | -0.18 | 3.23 | -0.17 |
| 120     | 3.30 | -0.50 | 3.14 | -0.35 | 3.20 | -0.33 |
| ROH     | 2.36 | -0.63 | 2.08 | -0.33 | 2.21 | -0.25 |
| CH3     | 3.30 | -0.58 | 3.38 | -0.21 | 3.40 | -0.21 |
| CH2     | 3.46 | -0.50 | 3.38 | -0.27 | 3.49 | -0.22 |

Interaction energies in kcal/mol and distances in Å.

Table S5. Free energies of solvation, kcal/mol, using the alcohol oxygen LJ parameters determined from the pure solvent simulations of the alcohols

| Alcohol | LRC   | Drude                    |       | Exp                      |
|---------|-------|--------------------------|-------|--------------------------|
|         |       | $\Delta G_{\text{solv}}$ | %diff | $\Delta G_{\text{solv}}$ |
| MeOH    | -0.26 | -5.20                    | 2     | -5.11                    |
| EtOH    | -0.35 | -5.66                    | 13    | -5.01                    |
| 2-PrOH  | -0.45 | -6.06                    | 27    | -4.76                    |
| 2-BuOH  | -0.57 | -6.11                    | 34    | -4.57                    |
| 1-PrOH  | -0.46 | -5.38                    | 11    | -4.83                    |
| 1-BuOH  | -0.57 | -5.72                    | 21    | -4.72                    |
| Average |       |                          | 18    |                          |

a) The long range correction is estimated for dispersion forces. In the polarizable model. b) Experimental results as reported in reference<sup>92</sup> and c) in reference.<sup>93</sup>

Table S6. Optimized internal parameters

| BONDS     |  | Parameter     | $K_b$      | $b_0$      | Phase    | Reused<br>from |
|-----------|--|---------------|------------|------------|----------|----------------|
| meoh      |  | OH1-CT3       | 430.0      | 1.425      |          |                |
| meoh      |  | OH1-H         | 536.5      | 0.970      |          |                |
| etoh      |  | OH1-CT2       | 396.0      | 1.425      |          |                |
| pro2      |  | OH2-CT1       | 350.0      | 1.440      |          |                |
| ANGLES    |  |               | $K_\theta$ | $\theta_0$ |          |                |
| meoh      |  | H-OH1-CT3     | 58.2       | 106.00     |          |                |
| meoh      |  | OH1-CT3-HA3   | 61.0       | 108.89     |          |                |
| etoh      |  | H-OH1-CT2     | 49.0       | 106.00     |          |                |
| etoh      |  | OH1-CT2-HA2   | 54.0       | 111.50     |          |                |
| etoh      |  | OH1-CT2-CT3   | 66.0       | 112.50     |          |                |
| pro1      |  | OH1-CT2-CT2   | 66.0       | 112.50     |          | etoh           |
| pro2      |  | H-OH2-CT1     | 59.0       | 108.00     |          |                |
| pro2      |  | OH2-CT1-CT3   | 66.0       | 113.10     |          |                |
| pro2      |  | OH2-CT1-HA1   | 47.00      | 104.00     |          |                |
| buo2      |  | OH2-CT1-CT2   | 59.30      | 113.10     |          | pro2           |
| DIHEDRALS |  |               | $K_\phi$   | n          | $\delta$ |                |
| meoh      |  | HA3-CT3-OH1-H | 0.179      | 3          | 0.0      |                |
| etoh      |  | H-OH1-CT2-CT3 | 1.250      | 1          | 0.0      |                |

|      |                 |       |   |     |
|------|-----------------|-------|---|-----|
|      | H-OH1-CT2-CT3   | 0.350 | 2 | 0.0 |
|      | H-OH1-CT2-CT3   | 0.360 | 3 | 0.0 |
| etoh | H-OH1-CT2-HA2   | 0.140 | 2 | 0.0 |
|      | H-OH1-CT2-HA2   | 0.130 | 3 | 0.0 |
| etoh | OH1-CT2-CT3-HA3 | 0.175 | 3 | 0.0 |
| pro1 | H-OH1-CT2-CT2   | 1.050 | 1 | 0.0 |
|      | H-OH1-CT2-CT2   | 0.370 | 2 | 0.0 |
|      | H-OH1-CT2-CT2   | 0.340 | 3 | 0.0 |
| pro1 | CT3-CT2-CT2-OH1 | 0.200 | 1 | 0.0 |
|      | CT3-CT2-CT2-OH1 | 0.410 | 2 | 0.0 |
|      | CT3-CT2-CT2-OH1 | 0.400 | 3 | 0.0 |
| pro1 | HA2-CT2-CT2-OH1 | 0.270 | 1 | 0.0 |
|      | HA2-CT2-CT2-OH1 | 0.050 | 2 | 0.0 |
|      | HA2-CT2-CT2-OH1 | 0.120 | 3 | 0.0 |
| pro2 | H-OH2-CT1-CT3   | 1.660 | 1 | 0.0 |
|      | H-OH2-CT1-CT3   | 0.120 | 2 | 0.0 |
|      | H-OH2-CT1-CT3   | 0.340 | 3 | 0.0 |
| pro2 | HA1-CT1-OH2-H   | 0.060 | 1 | 0.0 |
|      | HA1-CT1-OH2-H   | 0.060 | 2 | 0.0 |
| pro2 | OH2-CT1-CT3-HA3 | 0.075 | 3 | 0.0 |



|      |                 |       |   |     |        |
|------|-----------------|-------|---|-----|--------|
| buo1 | CT2-CT2-CT2-OH1 | 0.200 | 1 | 0.0 | pro1   |
|      | CT2-CT2-CT2-OH1 | 0.410 | 2 | 0.0 | pro1   |
|      | CT2-CT2-CT2-OH1 | 0.400 | 3 | 0.0 | pro1   |
| buo2 | CT3-CT2-CT1-OH2 | 0.200 | 1 | 0.0 | pro1   |
|      | CT3-CT2-CT1-OH2 | 0.410 | 2 | 0.0 | pro1   |
|      | CT3-CT2-CT1-OH2 | 0.400 | 3 | 0.0 | pro1   |
| buo2 | H-OH2-CT1-CT2   | 1.660 | 1 | 0.0 | pro2   |
|      | H-OH2-CT1-CT2   | 0.120 | 2 | 0.0 | pro2   |
|      | H-OH2-CT1-CT2   | 0.340 | 3 | 0.0 | pro2   |
| buo2 | OH2-CT1-CT2-HA2 | 0.075 | 3 | 0.0 | pro2   |
| buo2 | CT3-CT1-CT2-CT3 | 0.200 | 5 | 0.0 | alkane |
|      | CT3-CT1-CT2-CT3 | 0.144 | 4 | 0.0 | alkane |
|      | CT3-CT1-CT2-CT3 | 0.084 | 3 | 0.0 | alkane |
|      | CT3-CT1-CT2-CT3 | 0.126 | 2 | 0.0 | alkane |

---

$K_b$ ,  $K_\theta$  and  $K_\phi$  are the force constants for the bond, valence angle and dihedral angles terms, respectively,  $b_0$  and  $q_0$  are the bond and valence angle equilibrium parameters, respectively,  $n$  is the dihedral angle multiplicity and  $\delta$  is the dihedral angle phase.

Table S7. Complete set of Lennard-Jones parameters (well depth and radius) utilized in this work in the polarizable model (CHARMM parameter file format)

| Atom type                                 | $\epsilon$ ,<br>kcal/mol | $R_{\min}/2$ ,<br>Å | 1-4 $\epsilon$ ,<br>kcal/mol | 1-4<br>$R_{\min}/2$ , Å |
|-------------------------------------------|--------------------------|---------------------|------------------------------|-------------------------|
| H (OH group)                              | -0.01                    | 0.4                 | n/o                          | n/o                     |
| O (for all alcohols)                      | -0.15                    | 1.765               | n/o                          | n/o                     |
| O (alt. set for 1-propanol and 1-butanol) | -0.15                    | 1.74                | n/o                          | n/o                     |
| C (CH <sub>3</sub> methanol)              | -0.11                    | 2.04                | -0.01                        | 1.9                     |
| H (CH <sub>3</sub> methanol)              | -0.035                   | 1.34                | n/o                          | n/o                     |
| C (CH <sub>3</sub> polarizable alkanes)   | -0.078                   | 2.04                | -0.01                        | 1.9                     |
| C (CH <sub>2</sub> polarizable alkanes)   | -0.056                   | 2.01                | -0.01                        | 1.9                     |
| C (CH polarizable alkanes)                | -0.032                   | 2.00                | -0.01                        | 1.9                     |
| H (CH <sub>3</sub> polarizable alkanes)   | -0.024                   | 1.34                | n/o                          | n/o                     |
| H (CH <sub>2</sub> polarizable alkanes)   | -0.035                   | 1.34                | n/o                          | n/o                     |
| H (CH polarizable alkanes)                | -0.045                   | 1.32                | n/o                          | n/o                     |
| NBFIX OH1 OW                              | -0.18                    | 3.58 <sup>a</sup>   | n/o                          | n/o                     |
| NBFIX OH2 OW                              | -0.21                    | 3.60 <sup>a</sup>   | n/o                          | n/o                     |

a)  $R_{\min}$  values for the atom type pair used directly with NBFIX. n/o indicates parameter value is not optimized; the standard  $\epsilon$  and  $R_{\min}/2$  terms are applied to the 1-4 interactions.

Table S8. Scan of partial atomic charges (q) on COH site and its influence on molecular volume and enthalpy of vaporization (percent difference with experiment, Diff )

| MeOH # | qH   | qLP   | qC(O) | $V_m, \text{\AA}^3$ | Diff( $\Delta V_m$ ), % | $\Delta H_{\text{vap}}$ , kcal/mol | Diff( $\Delta H_{\text{vap}}$ ), % | Dipole, D |
|--------|------|-------|-------|---------------------|-------------------------|------------------------------------|------------------------------------|-----------|
| 0      | 0.34 | -0.25 | -0.08 | 65.77               | -2.2                    | 8.93                               | -0.2                               | 2.03      |
| 1      | 0.34 | -0.24 | -0.10 | 66.57               | -1.0                    | 8.59                               | -4.0                               | 1.93      |
| 2      | 0.34 | -0.23 | -0.12 | 67.56               | +0.5                    | 8.24                               | -8.0                               | 1.84      |
| 3      | 0.34 | -0.22 | -0.14 | 68.59               | +2.0                    | 7.88                               | -12.0                              | 1.76      |
| 4      | 0.34 | -0.21 | -0.16 | 69.08               | +2.7                    | 7.64                               | -14.6                              | 1.69      |
| 10     | 0.35 | -0.25 | -0.09 | 65.62               | -2.4                    | 9.26                               | +3.4                               | 2.01      |
| 11     | 0.35 | -0.24 | -0.11 | 66.56               | -1.0                    | 8.88                               | -0.8                               | 1.92      |
| 12     | 0.35 | -0.23 | -0.13 | 67.40               | +0.2                    | 8.58                               | -4.1                               | 1.83      |
| 13     | 0.35 | -0.22 | -0.15 | 68.31               | +1.6                    | 8.24                               | -8.0                               | 1.76      |
| 14     | 0.35 | -0.21 | -0.17 | 69.10               | +2.8                    | 7.95                               | -11.2                              | 1.70      |
| 20     | 0.36 | -0.25 | -0.10 | 65.42               | -2.7                    | 9.62                               | +7.5                               | 1.99      |
| 21     | 0.36 | -0.24 | -0.12 | 66.13               | -1.6                    | 9.31                               | +4.0                               | 1.91      |
| 22     | 0.36 | -0.23 | -0.14 | 67.28               | +0.1                    | 8.92                               | -0.4                               | 1.83      |
| 23     | 0.36 | -0.22 | -0.16 | 67.96               | +1.1                    | 8.64                               | -3.5                               | 1.76      |
| 24     | 0.36 | -0.21 | -0.18 | 68.55               | +2.0                    | 8.34                               | -6.8                               | 1.71      |
| 30     | 0.37 | -0.25 | -0.11 | 65.41               | -2.7                    | 10.02                              | +12.0                              | 1.98      |
| 31     | 0.37 | -0.24 | -0.13 | 66.33               | -1.3                    | 9.67                               | +8.0                               | 1.90      |
| 32     | 0.37 | -0.23 | -0.15 | 67.10               | -0.2                    | 9.31                               | +4.0                               | 1.83      |
| 33     | 0.37 | -0.22 | -0.17 | 67.87               | +1.0                    | 9.00                               | +0.5                               | 1.77      |
| 34     | 0.37 | -0.21 | -0.19 | 68.62               | +2.1                    | 8.69                               | -2.9                               | 1.72      |
| 40     | 0.38 | -0.25 | -0.12 | 65.55               | -2.5                    | 10.39                              | +16.1                              | 1.97      |
| 41     | 0.38 | -0.24 | -0.14 | 66.62               | -0.9                    | 10.03                              | +12.1                              | 1.90      |
| 42     | 0.38 | -0.23 | -0.16 | 67.06               | -0.3                    | 9.71                               | +8.5                               | 1.84      |

|      |      |       |       |       |      |       |       |      |
|------|------|-------|-------|-------|------|-------|-------|------|
| 43   | 0.38 | -0.22 | -0.18 | 67.66 | +0.6 | 9.43  | +5.4  | 1.78 |
| 44   | 0.38 | -0.21 | -0.20 | 67.70 | +0.7 | 9.22  | +3.1  | 1.74 |
| EtOH |      |       |       |       |      |       |       |      |
| 0    | 0.34 | -0.25 | 0.00  | 96.42 | -0.5 | 9.77  | -3.4  | 2.18 |
| 1    | 0.34 | -0.24 | -0.02 | 96.99 | +0.1 | 9.51  | -5.9  | 2.04 |
| 2    | 0.34 | -0.23 | -0.04 | 98.10 | +1.2 | 9.17  | -9.3  | 1.95 |
| 3    | 0.34 | -0.22 | -0.06 | 98.63 | +1.8 | 8.90  | -12.0 | 1.82 |
| 4    | 0.34 | -0.21 | -0.08 | 99.88 | +3.1 | 8.55  | -15.4 | 1.76 |
| 10   | 0.35 | -0.25 | -0.01 | 96.09 | -0.9 | 10.21 | +1.0  | 2.10 |
| 11   | 0.35 | -0.24 | -0.03 | 96.70 | -0.2 | 9.90  | -2.0  | 2.02 |
| 12   | 0.35 | -0.23 | -0.05 | 97.49 | +0.6 | 9.62  | -4.8  | 1.92 |
| 13   | 0.35 | -0.22 | -0.07 | 98.03 | +1.1 | 9.32  | -7.9  | 1.87 |
| 14   | 0.35 | -0.21 | -0.09 | 98.50 | +1.6 | 9.12  | -9.8  | 1.75 |
| 20   | 0.36 | -0.25 | -0.02 | 95.42 | -1.6 | 10.66 | +5.4  | 2.08 |
| 21   | 0.36 | -0.24 | -0.04 | 96.37 | -0.6 | 10.36 | +2.5  | 2.07 |
| 22   | 0.36 | -0.23 | -0.06 | 96.60 | -0.3 | 10.10 | -0.1  | 1.93 |
| 23   | 0.36 | -0.22 | -0.08 | 97.77 | +0.9 | 9.83  | -2.7  | 1.80 |
| 24   | 0.36 | -0.21 | -0.10 | 97.93 | +1.0 | 9.58  | -5.2  | 1.77 |
| 30   | 0.37 | -0.25 | -0.03 | 95.15 | -1.8 | 11.18 | +10.6 | 2.13 |
| 31   | 0.37 | -0.24 | -0.05 | 95.77 | -1.2 | 10.81 | +6.9  | 2.06 |
| 32   | 0.37 | -0.23 | -0.07 | 96.36 | -0.6 | 10.60 | +4.9  | 1.90 |
| 33   | 0.37 | -0.22 | -0.09 | 97.28 | +0.4 | 10.28 | +1.7  | 1.84 |
| 34   | 0.37 | -0.21 | -0.11 | 97.95 | +1.1 | 9.99  | -1.2  | 1.76 |
| 40   | 0.38 | -0.25 | -0.04 | 95.22 | -1.8 | 11.61 | +14.8 | 2.09 |
| 41   | 0.38 | -0.24 | -0.06 | 95.71 | -1.3 | 11.32 | +11.9 | 1.99 |
| 42   | 0.38 | -0.23 | -0.08 | 96.50 | -0.4 | 11.02 | +9.0  | 1.95 |
| 43   | 0.38 | -0.22 | -0.10 | 97.06 | +0.1 | 10.78 | +6.6  | 1.83 |

|        |      |       |       |        |      |       |       |      |
|--------|------|-------|-------|--------|------|-------|-------|------|
| 44     | 0.38 | -0.21 | -0.12 | 97.40  | +0.5 | 10.52 | +4.1  | 1.79 |
| 2-PrOH |      |       |       |        |      |       |       |      |
| 0      | 0.34 | -0.25 | 0.06  | 125.82 | -1.5 | 10.33 | -4.8  | 2.19 |
| 1      | 0.34 | -0.24 | 0.04  | 126.20 | -1.2 | 10.16 | -6.4  | 2.08 |
| 2      | 0.34 | -0.23 | 0.02  | 127.43 | -0.3 | 9.84  | -9.3  | 1.98 |
| 3      | 0.34 | -0.22 | 0.00  | 127.55 | -0.2 | 9.66  | -11.0 | 1.89 |
| 4      | 0.34 | -0.21 | -0.02 | 129.11 | +1.0 | 9.39  | -13.5 | 1.80 |
| 10     | 0.35 | -0.25 | 0.05  | 125.35 | -1.9 | 10.85 | +0.0  | 2.17 |
| 11     | 0.35 | -0.24 | 0.03  | 125.61 | -1.7 | 10.64 | -1.9  | 2.07 |
| 12     | 0.35 | -0.23 | 0.01  | 126.72 | -0.8 | 10.38 | -4.3  | 1.97 |
| 13     | 0.35 | -0.22 | -0.01 | 126.65 | -0.9 | 10.23 | -5.7  | 1.88 |
| 14     | 0.35 | -0.21 | -0.03 | 127.71 | -0.1 | 10.03 | -7.5  | 1.80 |
| 20     | 0.36 | -0.25 | 0.04  | 124.18 | -2.8 | 11.39 | +5.0  | 2.15 |
| 21     | 0.36 | -0.24 | 0.02  | 125.06 | -2.1 | 11.18 | +3.0  | 2.05 |
| 22     | 0.36 | -0.23 | 0.00  | 125.81 | -1.5 | 10.96 | +1.0  | 1.96 |
| 23     | 0.36 | -0.22 | -0.02 | 126.07 | -1.3 | 10.80 | -0.5  | 1.88 |
| 24     | 0.36 | -0.21 | -0.04 | 126.91 | -0.7 | 10.54 | -2.9  | 1.80 |
| 30     | 0.37 | -0.25 | 0.03  | 123.78 | -3.1 | 11.97 | +10.3 | 2.14 |
| 31     | 0.37 | -0.24 | 0.01  | 124.75 | -2.4 | 11.71 | +7.9  | 2.04 |
| 32     | 0.37 | -0.23 | -0.01 | 125.19 | -2.0 | 11.52 | +6.2  | 1.96 |
| 33     | 0.37 | -0.22 | -0.03 | 125.41 | -1.9 | 11.37 | +4.8  | 1.88 |
| 34     | 0.37 | -0.21 | -0.05 | 125.60 | -1.7 | 11.19 | +3.1  | 1.81 |
| 40     | 0.38 | -0.25 | 0.02  | 123.22 | -3.6 | 12.54 | +15.6 | 2.13 |
| 41     | 0.38 | -0.24 | 0.00  | 123.92 | -3.0 | 12.32 | +13.6 | 2.04 |
| 42     | 0.38 | -0.23 | -0.02 | 125.06 | -2.1 | 12.10 | +11.5 | 1.95 |
| 43     | 0.38 | -0.22 | -0.04 | 125.30 | -1.9 | 11.95 | +10.2 | 1.88 |
| 44     | 0.38 | -0.21 | -0.06 | 125.33 | -1.9 | 11.74 | +8.2  | 1.81 |

Table S9. Scan of atomic polarizabilities ( $\alpha$ ) on COH site and its influence on molecular volume and enthalpy of vaporization (percent differences with experiment, Diff )

| MeOH # | C $\alpha$ | O $\alpha$ | V <sub>m</sub> , Å <sup>3</sup> | Diff( $\Delta$ V <sub>m</sub> ), % | $\Delta$ H <sub>vap</sub> , kcal/mol | Diff( $\Delta$ H <sub>vap</sub> ), % | Dipole, D |
|--------|------------|------------|---------------------------------|------------------------------------|--------------------------------------|--------------------------------------|-----------|
| 0      | 0.8        | 0.8        | 68.37                           | +1.7                               | 8.34                                 | -6.8                                 | 1.83      |
| 1      | 0.8        | 0.9        | 67.89                           | +1.0                               | 8.60                                 | -3.9                                 | 1.83      |
| 2      | 0.8        | 1.0        | 67.54                           | +0.5                               | 8.85                                 | -1.1                                 | 1.83      |
| 3      | 0.8        | 1.1        | 66.69                           | -0.8                               | 9.22                                 | +3.1                                 | 1.83      |
| 4      | 0.8        | 1.2        | 66.44                           | -1.2                               | 9.67                                 | +8.0                                 | 1.83      |
| 10     | 0.9        | 0.8        | 68.43                           | +1.8                               | 8.34                                 | -6.8                                 | 1.83      |
| 11     | 0.9        | 0.9        | 67.66                           | +0.6                               | 8.63                                 | -3.6                                 | 1.83      |
| 12     | 0.9        | 1.0        | 67.26                           | +0.1                               | 8.91                                 | -0.5                                 | 1.83      |
| 13     | 0.9        | 1.1        | 66.64                           | -0.9                               | 9.30                                 | +3.9                                 | 1.83      |
| 14     | 0.9        | 1.2        | 66.50                           | -1.1                               | 9.66                                 | +8.0                                 | 1.83      |
| 20     | 1.0        | 0.8        | 67.91                           | +1.0                               | 8.38                                 | -6.3                                 | 1.83      |
| 21     | 1.0        | 0.9        | 67.66                           | +0.6                               | 8.63                                 | -3.5                                 | 1.83      |
| 22     | 1.0        | 1.0        | 67.22                           | -0.0                               | 8.92                                 | -0.3                                 | 1.83      |
| 23     | 1.0        | 1.1        | 66.96                           | -0.4                               | 9.26                                 | +3.4                                 | 1.83      |
| 24     | 1.0        | 1.2        | 66.24                           | -1.5                               | 9.68                                 | +8.2                                 | 1.83      |
| 30     | 1.1        | 0.8        | 68.08                           | +1.3                               | 8.40                                 | -6.1                                 | 1.83      |
| 31     | 1.1        | 0.9        | 67.54                           | +0.5                               | 8.67                                 | -3.2                                 | 1.83      |
| 32     | 1.1        | 1.0        | 67.19                           | -0.1                               | 8.95                                 | +0.0                                 | 1.83      |
| 33     | 1.1        | 1.1        | 66.37                           | -1.3                               | 9.35                                 | +4.5                                 | 1.83      |
| 34     | 1.1        | 1.2        | 66.20                           | -1.5                               | 9.69                                 | +8.3                                 | 1.83      |
| 40     | 1.2        | 0.8        | 67.97                           | +1.1                               | 8.42                                 | -5.9                                 | 1.83      |
| 41     | 1.2        | 0.9        | 67.36                           | +0.2                               | 8.70                                 | -2.8                                 | 1.83      |

|      |     |     |       |      |       |       |      |
|------|-----|-----|-------|------|-------|-------|------|
| 42   | 1.2 | 1.0 | 66.97 | -0.4 | 8.98  | +0.4  | 1.83 |
| 43   | 1.2 | 1.1 | 66.66 | -0.8 | 9.33  | +4.2  | 1.83 |
| 44   | 1.2 | 1.2 | 65.87 | -2.0 | 9.78  | +9.2  | 1.83 |
| EtOH |     |     |       |      |       |       |      |
| 0    | 0.8 | 0.8 | 98.78 | +1.9 | 9.22  | -8.8  | 1.94 |
| 1    | 0.8 | 0.9 | 98.11 | +1.2 | 9.59  | -5.1  | 1.89 |
| 2    | 0.8 | 1.0 | 97.00 | +0.1 | 10.10 | -0.1  | 1.89 |
| 3    | 0.8 | 1.1 | 96.53 | -0.4 | 10.61 | +5.0  | 1.95 |
| 4    | 0.8 | 1.2 | 95.56 | -1.4 | 11.23 | +11.1 | 1.94 |
| 10   | 0.9 | 0.8 | 98.50 | +1.6 | 9.24  | -8.7  | 1.93 |
| 11   | 0.9 | 0.9 | 97.82 | +0.9 | 9.64  | -4.6  | 1.92 |
| 12   | 0.9 | 1.0 | 97.07 | +0.2 | 10.10 | -0.1  | 1.93 |
| 13   | 0.9 | 1.1 | 95.95 | -1.0 | 10.61 | +5.0  | 1.92 |
| 14   | 0.9 | 1.2 | 95.71 | -1.3 | 11.19 | +10.7 | 1.94 |
| 20   | 1.0 | 0.8 | 98.21 | +1.3 | 9.25  | -8.5  | 1.92 |
| 21   | 1.0 | 0.9 | 97.61 | +0.7 | 9.64  | -4.6  | 1.94 |
| 22   | 1.0 | 1.0 | 96.88 | -0.0 | 10.11 | -0.0  | 1.88 |
| 23   | 1.0 | 1.1 | 96.41 | -0.5 | 10.60 | +4.8  | 1.92 |
| 24   | 1.0 | 1.2 | 95.42 | -1.5 | 11.24 | +11.2 | 1.90 |
| 30   | 1.1 | 0.8 | 98.11 | +1.2 | 9.25  | -8.5  | 1.88 |
| 31   | 1.1 | 0.9 | 96.99 | +0.1 | 9.69  | -4.1  | 1.92 |
| 32   | 1.1 | 1.0 | 96.68 | -0.3 | 10.11 | -0.0  | 1.93 |
| 33   | 1.1 | 1.1 | 95.92 | -1.0 | 10.63 | +5.1  | 1.91 |
| 34   | 1.1 | 1.2 | 95.73 | -1.2 | 11.22 | +11.0 | 1.88 |
| 40   | 1.2 | 0.8 | 98.22 | +1.3 | 9.25  | -8.5  | 1.92 |
| 41   | 1.2 | 0.9 | 97.48 | +0.6 | 9.65  | -4.5  | 1.97 |
| 42   | 1.2 | 1.0 | 96.96 | +0.0 | 10.10 | -0.1  | 1.95 |

|        |     |     |        |      |       |       |      |
|--------|-----|-----|--------|------|-------|-------|------|
| 43     | 1.2 | 1.1 | 96.44  | -0.5 | 10.59 | +4.7  | 1.90 |
| 44     | 1.2 | 1.2 | 95.21  | -1.8 | 11.22 | +10.9 | 1.95 |
| 2-PrOH |     |     |        |      |       |       |      |
| 0      | 0.8 | 0.8 | 127.43 | -0.3 | 10.06 | -7.3  | 1.97 |
| 1      | 0.8 | 0.9 | 126.53 | -1.0 | 10.52 | -3.0  | 1.97 |
| 2      | 0.8 | 1.0 | 125.70 | -1.6 | 11.03 | +1.7  | 1.96 |
| 3      | 0.8 | 1.1 | 124.98 | -2.2 | 11.53 | +6.2  | 1.96 |
| 4      | 0.8 | 1.2 | 124.55 | -2.5 | 12.16 | +12.0 | 1.96 |
| 10     | 0.9 | 0.8 | 127.24 | -0.4 | 10.10 | -6.9  | 1.97 |
| 11     | 0.9 | 0.9 | 126.26 | -1.2 | 10.59 | -2.4  | 1.97 |
| 12     | 0.9 | 1.0 | 125.51 | -1.8 | 11.03 | +1.6  | 1.96 |
| 13     | 0.9 | 1.1 | 124.58 | -2.5 | 11.53 | +6.3  | 1.96 |
| 14     | 0.9 | 1.2 | 124.31 | -2.7 | 12.19 | +12.4 | 1.96 |
| 20     | 1.0 | 0.8 | 127.04 | -0.6 | 10.07 | -7.2  | 1.97 |
| 21     | 1.0 | 0.9 | 126.25 | -1.2 | 10.55 | -2.8  | 1.96 |
| 22     | 1.0 | 1.0 | 125.70 | -1.6 | 10.96 | +1.1  | 1.96 |
| 23     | 1.0 | 1.1 | 125.20 | -2.0 | 11.44 | +5.4  | 1.96 |
| 24     | 1.0 | 1.2 | 124.39 | -2.7 | 12.19 | +12.4 | 1.95 |
| 30     | 1.1 | 0.8 | 126.88 | -0.7 | 10.06 | -7.3  | 1.97 |
| 31     | 1.1 | 0.9 | 126.31 | -1.2 | 10.49 | -3.3  | 1.96 |
| 32     | 1.1 | 1.0 | 125.35 | -1.9 | 11.02 | +1.6  | 1.96 |
| 33     | 1.1 | 1.1 | 125.01 | -2.2 | 11.52 | +6.2  | 1.96 |
| 34     | 1.1 | 1.2 | 124.57 | -2.5 | 12.14 | +11.9 | 1.95 |
| 40     | 1.2 | 0.8 | 126.66 | -0.9 | 10.10 | -6.9  | 1.97 |
| 41     | 1.2 | 0.9 | 126.08 | -1.3 | 10.56 | -2.7  | 1.96 |
| 42     | 1.2 | 1.0 | 126.10 | -1.3 | 10.97 | +1.1  | 1.96 |
| 43     | 1.2 | 1.1 | 125.08 | -2.1 | 11.57 | +6.6  | 1.96 |



44      1.2      1.2      124.61      -2.5      12.16      +12.1      1.95

---

Table S10. Scan of atomic polarizabilities ( $\alpha$ ) on alkane CH<sub>3</sub> site and its influence on molecular volume and enthalpy of vaporization (percent differences with experiment, Diff )

| EtOH # | C <sub>Me</sub> $\alpha$ | V <sub>m</sub> , Å <sup>3</sup> | Diff( $\Delta V_m$ ), % | $\Delta H_{vap}$ , kcal/mol | Diff( $\Delta H_{vap}$ ) % | Dipole, D |
|--------|--------------------------|---------------------------------|-------------------------|-----------------------------|----------------------------|-----------|
| 0      | 1.3                      | 97.30                           | +0.4                    | 10.07                       | -0.4                       | 1.89      |
| 1      | 1.4                      | 96.95                           | 0.0                     | 10.09                       | -0.2                       | 1.91      |
| 2      | 1.5                      | 96.85                           | -0.1                    | 10.09                       | -0.2                       | 1.92      |
| 2-PrOH |                          |                                 |                         |                             |                            |           |
| 0      | 1.3                      | 125.88                          | -1.5                    | 11.01                       | +1.5                       | 1.94      |
| 1      | 1.4                      | 125.48                          | -1.8                    | 11.04                       | +1.7                       | 1.96      |
| 2      | 1.5                      | 126.11                          | -1.3                    | 10.92                       | +0.6                       | 1.97      |

Table S11. Component analysis of five independent hydration free energy calculations.

| #             | $\Delta G$ , kcal/mol | E <sub>rep</sub> <sup>solv</sup> , kcal/mol | E <sub>disp</sub> <sup>solv</sup> , kcal/mol | E <sub>elst</sub> <sup>solv</sup> , kcal/mol | E <sub>rep</sub> <sup>gas</sup> , kcal/mol | E <sub>disp</sub> <sup>gas</sup> , kcal/mol | E <sub>elst</sub> <sup>gas</sup> , kcal/mol |
|---------------|-----------------------|---------------------------------------------|----------------------------------------------|----------------------------------------------|--------------------------------------------|---------------------------------------------|---------------------------------------------|
| MeOH additive |                       |                                             |                                              |                                              |                                            |                                             |                                             |
| 1             | -4.82                 | 8.57                                        | -7.36                                        | 5.61                                         | 0.00                                       | -0.02                                       | 11.66                                       |
| 2             | -4.81                 | 8.80                                        | -7.39                                        | 5.42                                         | 0.00                                       | -0.02                                       | 11.66                                       |
| 3             | -4.86                 | 8.66                                        | -7.41                                        | 5.54                                         | 0.00                                       | -0.02                                       | 11.66                                       |
| 4             | -4.66                 | 8.84                                        | -7.40                                        | 5.55                                         | 0.00                                       | -0.02                                       | 11.66                                       |
| 5             | -4.76                 | 8.86                                        | -7.41                                        | 5.44                                         | 0.00                                       | -0.02                                       | 11.66                                       |
| MeOH polar    |                       |                                             |                                              |                                              |                                            |                                             |                                             |
| 1             | -5.22                 | 8.35                                        | -7.42                                        | 5.48                                         | 0.00                                       | -0.02                                       | 11.66                                       |
| 2             | -4.68                 | 8.75                                        | -7.41                                        | 5.62                                         | 0.00                                       | -0.02                                       | 11.66                                       |

|        |          |            |        |        |      |       |       |
|--------|----------|------------|--------|--------|------|-------|-------|
| 3      | -4.80    | 8.66       | -7.39  | 5.57   | 0.00 | -0.02 | 11.66 |
| 4      | -4.94    | 8.54       | -7.41  | 5.57   | 0.00 | -0.02 | 11.66 |
| 5      | -5.08    | 8.34       | -7.40  | 5.62   | 0.00 | -0.02 | 11.66 |
| EtOH   | additive |            |        |        |      |       |       |
| 1      | -5.09    | 10.08      | -8.35  | -12.14 | 0.31 | -0.30 | -5.34 |
| 2      | -5.09    | 10.04      | -8.34  | -12.11 | 0.30 | -0.30 | -5.33 |
| 3      | -5.05    | 10.06      | -8.33  | -12.07 | 0.30 | -0.30 | -5.30 |
| 4      | -4.82    | 10.35      | -8.37  | -12.15 | 0.30 | -0.30 | -5.35 |
| 5      | -5.13    | 9.94       | -8.32  | -12.08 | 0.30 | -0.30 | -5.33 |
| EtOH   | polar    |            |        |        |      |       |       |
| 1      | -4.79    | 11.60      | -9.46  | -5.95  | 0.32 | -0.34 | 1.00  |
| 2      | -5.68    | 10.85      | -9.52  | -6.07  | 0.33 | -0.34 | 0.95  |
| 3      | -5.46    | 11.03      | -9.44  | -6.06  | 0.32 | -0.34 | 1.02  |
| 4      | -5.23    | 11.45      | -9.42  | -6.23  | 0.31 | -0.34 | 1.05  |
| 5      | -5.43    | 11.24      | -9.48  | -6.23  | 0.33 | -0.34 | 0.98  |
| 1-PrOH | additive |            |        |        |      |       |       |
| 1      | -5.04    | 12.26      | -10.64 | 1.02   | 0.60 | -0.59 | 7.66  |
| 2      | -4.82    | 12.48      | -10.69 | 0.98   | 0.66 | -0.57 | 7.50  |
| 3      | -5.10    | 12.15      | -10.66 | 0.77   | 0.61 | -0.57 | 7.32  |
| 4      | -4.53    | 12.66      | -10.60 | 0.99   | 0.59 | -0.57 | 7.55  |
| 5      | -5.04    | 12.34      | -10.60 | 0.94   | 0.60 | -0.58 | 7.70  |
| 1-PrOH | polar    | LJ(O)=1.74 |        |        |      |       |       |
| 1      | -5.44    | 13.66      | -12.00 | -2.80  | 0.68 | -0.73 | 4.35  |
| 2      | -5.50    | 13.59      | -12.05 | -2.61  | 0.70 | -0.73 | 4.46  |
| 3      | -5.18    | 13.99      | -12.15 | -2.75  | 0.66 | -0.72 | 4.34  |
| 4      | -5.30    | 13.80      | -12.02 | -2.67  | 0.67 | -0.72 | 4.46  |
| 5      | -5.70    | 13.62      | -12.16 | -2.81  | 0.68 | -0.72 | 4.39  |

|        |          |             |       |        |        |      |       |        |
|--------|----------|-------------|-------|--------|--------|------|-------|--------|
| 1-PrOH | polar    | LJ(O)=1.765 |       |        |        |      |       |        |
| 1      |          | -5.03       | 13.77 | -12.13 | -2.24  | 0.73 | -0.72 | 4.42   |
| 2      |          | -5.11       | 13.78 | -12.17 | -2.27  | 0.74 | -0.73 | 4.43   |
| 3      |          | -4.71       | 14.05 | -12.18 | -2.19  | 0.72 | -0.73 | 4.39   |
| 4      |          | -4.70       | 14.13 | -12.18 | -2.20  | 0.74 | -0.73 | 4.43   |
| 5      |          | -5.05       | 13.90 | -12.20 | -2.27  | 0.75 | -0.74 | 4.47   |
| 1-BuOH | additive |             |       |        |        |      |       |        |
| 1      |          | -5.01       | 14.77 | -13.00 | -1.57  | 1.12 | -0.97 | 5.07   |
| 2      |          | -5.05       | 14.56 | -12.92 | -1.63  | 1.08 | -0.96 | 4.94   |
| 3      |          | -5.01       | 14.61 | -12.91 | -1.57  | 1.05 | -0.99 | 5.09   |
| 4      |          | -5.41       | 14.67 | -13.03 | -1.66  | 1.24 | -0.95 | 5.10   |
| 5      |          | -4.85       | 14.76 | -12.93 | -1.38  | 1.18 | -0.94 | 5.06   |
| 1-BuOH | polar    | LJ(O)=1.74  |       |        |        |      |       |        |
| 1      |          | -5.56       | 16.41 | -14.78 | -2.92  | 1.43 | -1.28 | 4.12   |
| 2      |          | -5.93       | 16.43 | -14.82 | -3.07  | 1.54 | -1.25 | 4.19   |
| 3      |          | -5.34       | 16.86 | -14.95 | -2.99  | 1.41 | -1.26 | 4.13   |
| 4      |          | -5.75       | 16.57 | -14.85 | -3.18  | 1.38 | -1.27 | 4.18   |
| 5      |          | -5.80       | 16.46 | -14.79 | -3.09  | 1.46 | -1.26 | 4.18   |
| 1-BuOH | polar    | LJ(O)=1.765 |       |        |        |      |       |        |
| 1      |          | -5.29       | 16.56 | -14.89 | -2.63  | 1.43 | -1.25 | 4.15   |
| 2      |          | -5.08       | 16.78 | -14.85 | -2.60  | 1.51 | -1.26 | 4.16   |
| 3      |          | -4.99       | 16.56 | -14.82 | -2.47  | 1.39 | -1.25 | 4.13   |
| 4      |          | -5.43       | 16.38 | -14.81 | -2.52  | 1.58 | -1.27 | 4.17   |
| 5      |          | -4.97       | 16.86 | -14.86 | -2.54  | 1.52 | -1.24 | 4.16   |
| 2-PrOH | additive |             |       |        |        |      |       |        |
| 1      |          | -4.78       | 12.32 | -10.22 | -48.71 | 0.72 | -0.64 | -41.91 |
| 2      |          | -4.56       | 12.56 | -10.23 | -48.69 | 0.74 | -0.64 | -41.89 |

|                 |       |       |        |        |      |       |        |
|-----------------|-------|-------|--------|--------|------|-------|--------|
| 3               | -4.62 | 12.34 | -10.15 | -48.60 | 0.75 | -0.64 | -41.90 |
| 4               | -4.71 | 12.32 | -10.14 | -48.66 | 0.75 | -0.64 | -41.88 |
| 5               | -4.73 | 12.26 | -10.15 | -48.70 | 0.74 | -0.64 | -41.96 |
| 2-PrOH polar    |       |       |        |        |      |       |        |
| 1               | -5.64 | 13.81 | -11.70 | -23.25 | 0.74 | -0.73 | -15.52 |
| 2               | -5.35 | 13.81 | -11.67 | -23.05 | 0.71 | -0.73 | -15.54 |
| 3               | -5.91 | 13.47 | -11.66 | -23.30 | 0.70 | -0.73 | -15.55 |
| 4               | -5.77 | 13.78 | -11.79 | -23.28 | 0.73 | -0.73 | -15.53 |
| 5               | -5.36 | 14.07 | -11.74 | -23.20 | 0.72 | -0.73 | -15.50 |
| 2-BuOH additive |       |       |        |        |      |       |        |
| 1               | -4.75 | 14.68 | -12.56 | -28.62 | 1.51 | -1.10 | -22.17 |
| 2               | -4.39 | 14.89 | -12.45 | -28.60 | 1.52 | -1.10 | -22.19 |
| 3               | -4.55 | 14.91 | -12.53 | -28.61 | 1.57 | -1.10 | -22.15 |
| 4               | -4.67 | 14.66 | -12.53 | -28.53 | 1.55 | -1.10 | -22.17 |
| 5               | -4.06 | 15.23 | -12.49 | -28.54 | 1.53 | -1.10 | -22.17 |
| 2-BuOH polar    |       |       |        |        |      |       |        |
| 1               | -5.59 | 16.71 | -14.50 | -16.34 | 1.56 | -1.28 | -8.82  |
| 2               | -5.55 | 16.45 | -14.43 | -16.18 | 1.46 | -1.26 | -8.81  |
| 3               | -5.77 | 16.36 | -14.49 | -16.09 | 1.63 | -1.27 | -8.81  |
| 4               | -5.23 | 16.86 | -14.38 | -16.18 | 1.65 | -1.28 | -8.84  |
| 5               | -5.58 | 16.71 | -14.50 | -16.26 | 1.60 | -1.27 | -8.81  |

---

Energies in kcal/mol. Polarizable results based on the LJ parameters optimized based on the pure solvent properties of the alcohols.
